# Supplementary material for: Co-doped RuO2 nanoparticles with enhanced catalytic activity and stability for the oxygen evolution reaction
Source: Royal Society of Chemistry journal article supplement (doi:10.1039/d3dt03047d), 2023-11-30
Supplement: d3dt03047d1.pdf [file d3dt03047d1.pdf]

## Supplementary Information

### Co-doped RuO<sub>2</sub> nanoparticles with enhanced catalytic activity and stability for oxygen evolution reaction

Wei Zhang<sup>1</sup>, Jiabing Luo<sup>1</sup>, Han Tang<sup>1</sup>, Shutao Wang<sup>2</sup>, Wenle Li<sup>1</sup>, Jun Zhang<sup>1</sup>, Yan Zhou<sup>1,\*</sup>

1. School of Materials Science and Engineering, China University of Petroleum (East China), Qingdao 266580, CHINA (yanzhou@upc.edu.cn)
2. College of Chemistry and Chemical Engineering, China University of Petroleum (East China), Qingdao 266580, CHINA

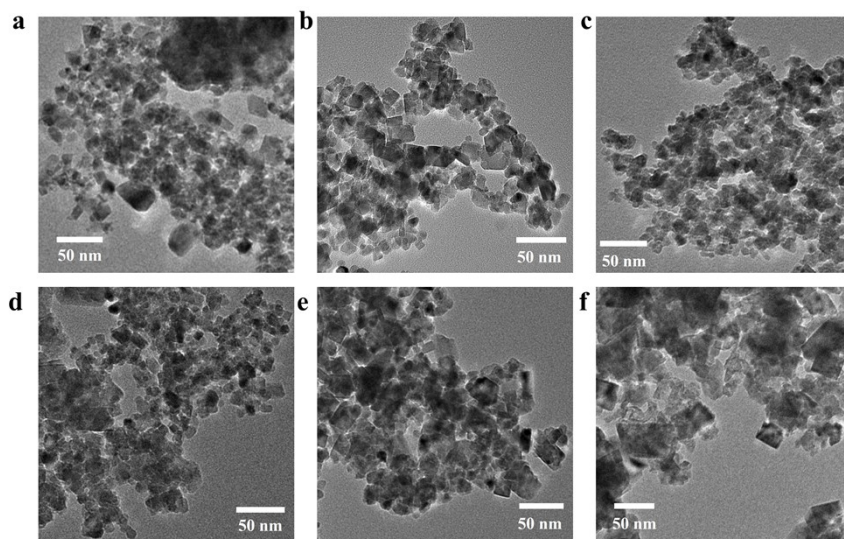

**Fig. S1.** TEM images of (a) homemade RuO<sub>2</sub>, (b) Ru<sub>0.98</sub>Co<sub>0.02</sub>O<sub>y</sub>, (c) Ru<sub>0.94</sub>Co<sub>0.06</sub>O<sub>y</sub>, (d) Ru<sub>0.92</sub>Co<sub>0.08</sub>O<sub>y</sub>, (e) Ru<sub>0.86</sub>Co<sub>0.14</sub>O<sub>y</sub>, (f) Ru<sub>0.71</sub>Co<sub>0.29</sub>O<sub>y</sub>.

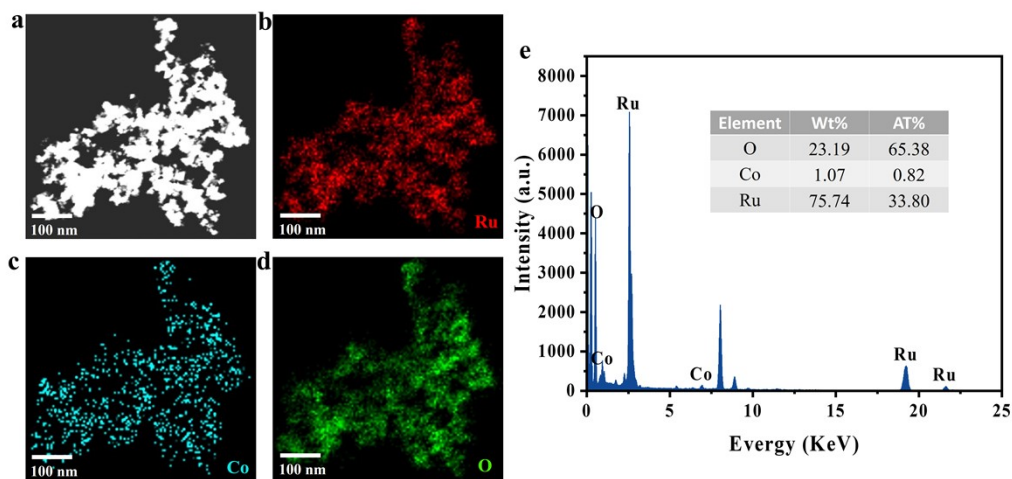

Fig. S2. (a) HAADF-STEM image, EDS elemental mapping of  $\text{Ru}_{0.98}\text{Co}_{0.02}\text{O}_y$  for Ru(b), Co(c), O(d), and (e) corresponding EDS spectrum.

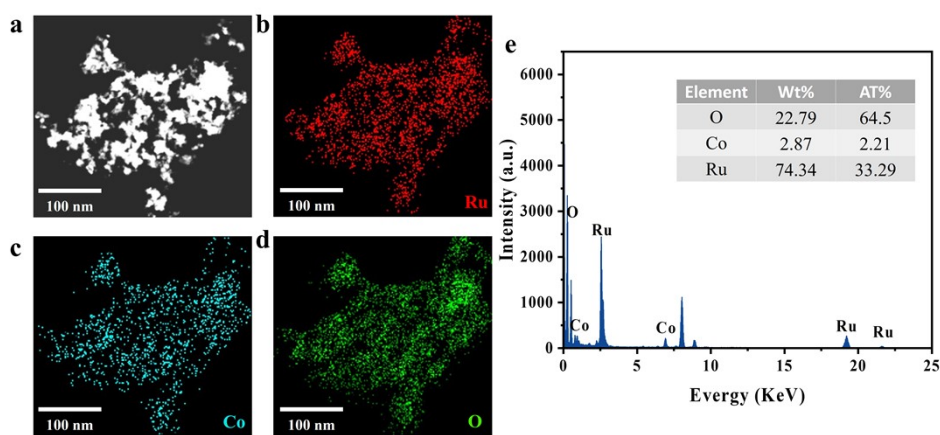

Fig. S3. (a) HAADF-STEM image, EDS elemental mapping of  $\text{Ru}_{0.94}\text{Co}_{0.06}\text{O}_y$  for Ru(b), Co(c), O(d), and (e) corresponding EDS spectrum.

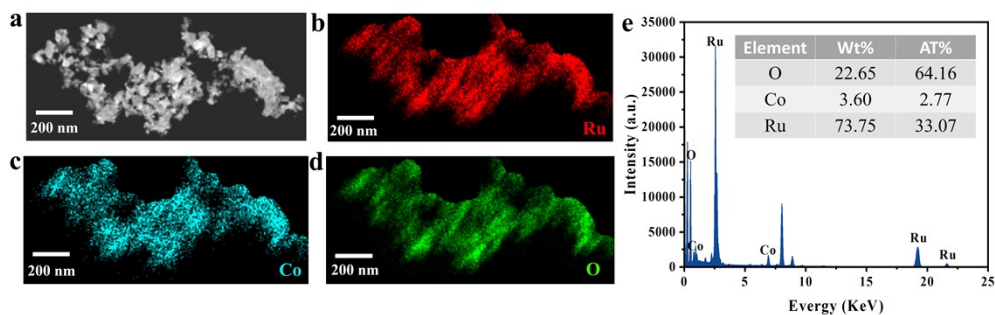

Fig. S4. (a) HAADF-STEM image, EDS elemental mapping of  $\text{Ru}_{0.92}\text{Co}_{0.08}\text{O}_y$  for Ru(b), Co(c), O(d), and (e) corresponding EDS spectrum.

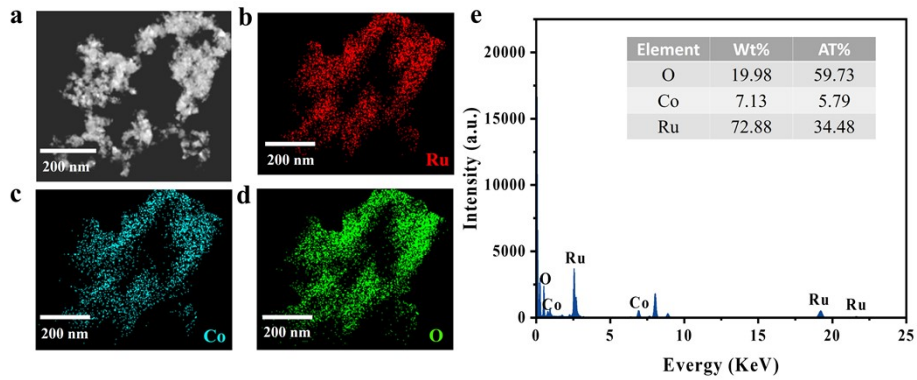

**Fig. S5.** (a) HAADF-STEM image, EDS elemental mapping of  $\text{Ru}_{0.86}\text{Co}_{0.14}\text{O}_y$  for Ru(b), Co(c), O(d), and (e) corresponding EDS spectrum.

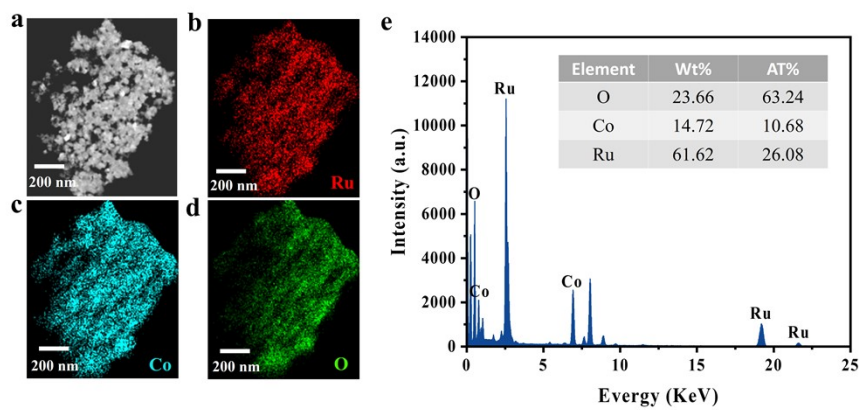

**Fig. S6.** (a) HAADF-STEM image, EDS elemental mapping of  $\text{Ru}_{0.71}\text{Co}_{0.29}\text{O}_y$  for Ru(b), Co(c), O(d), and (e) corresponding EDS spectrum.

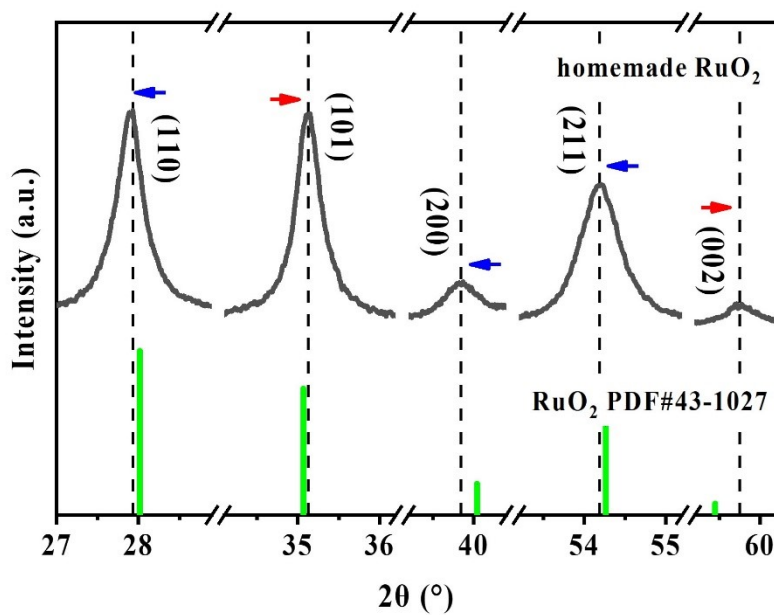

**Fig. S7.** Details of XRD pattern of homemade  $\text{RuO}_2$  for the diffraction peak of (110), (101), (200), (211), (002) crystal planes.

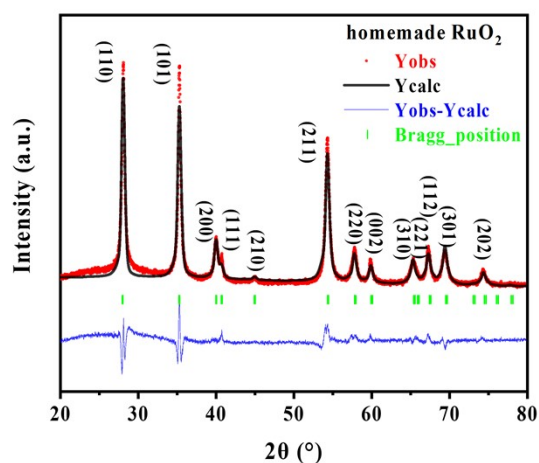

**Fig. S8.** Rietveld refinement of XRD patterns for homemade RuO<sub>2</sub>.

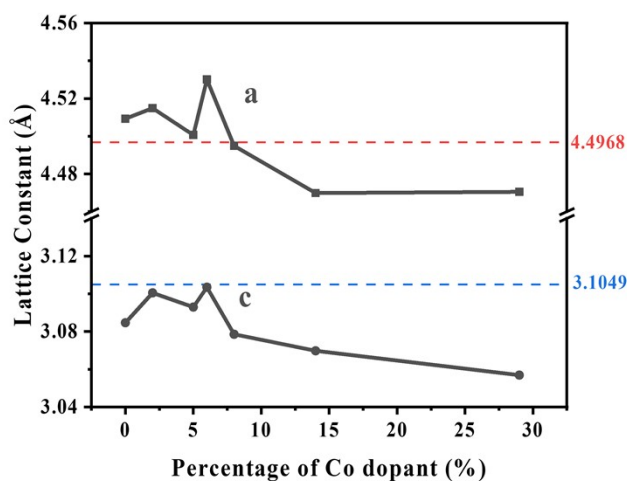

**Fig. S9.** Lattice constant of Ru<sub>1-x</sub>Co<sub>x</sub>O<sub>y</sub> from XRD refinement by Rietveld techniques, with the red and blue dashed lines correspond to the lattice constants a and c of the standard RuO<sub>2</sub> crystal respectively.

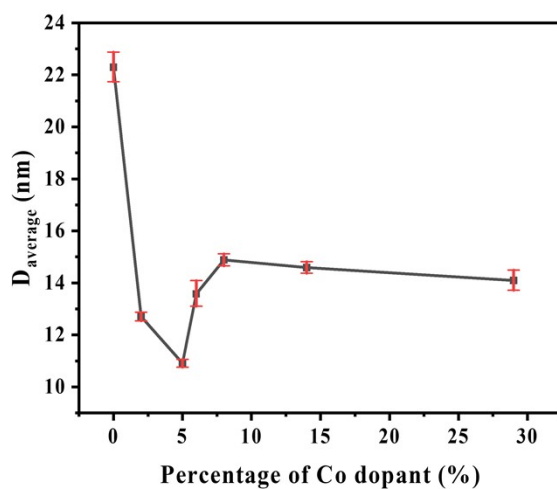

**Fig. S10.** The average grain size of Ru<sub>1-x</sub>Co<sub>x</sub>O<sub>y</sub> calculated from Scherrer equation. The error bars represents the systematic error of calculation based on Scherrer equation.

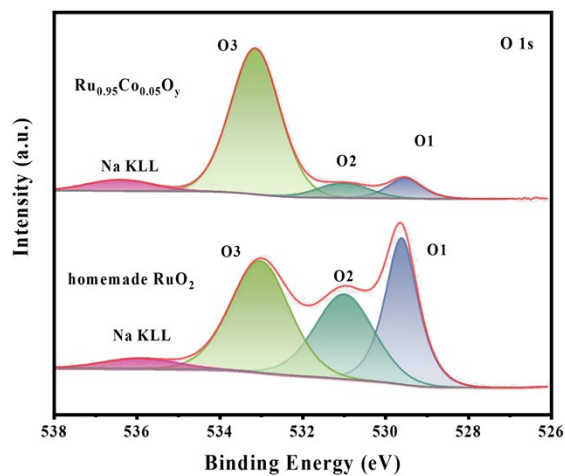

**Fig. S11.** High-resolution XPS spectra of O 1s orbitals of  $\text{Ru}_{0.95}\text{Co}_{0.05}\text{O}_y$ .

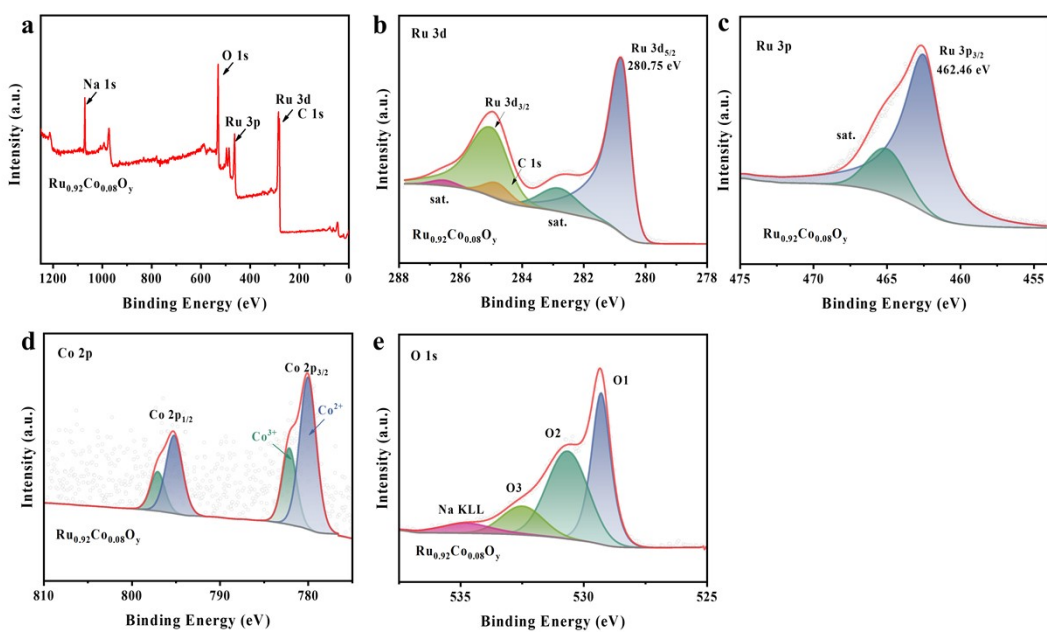

**Fig. S12.** (a) XPS full spectra of  $\text{Ru}_{0.92}\text{Co}_{0.08}\text{O}_y$  and high-resolution XPS spectra of (b) Ru 3d, (c) Ru 3p, (d) Co 2p, (e) O 1s orbitals of  $\text{Ru}_{0.92}\text{Co}_{0.08}\text{O}_y$ .

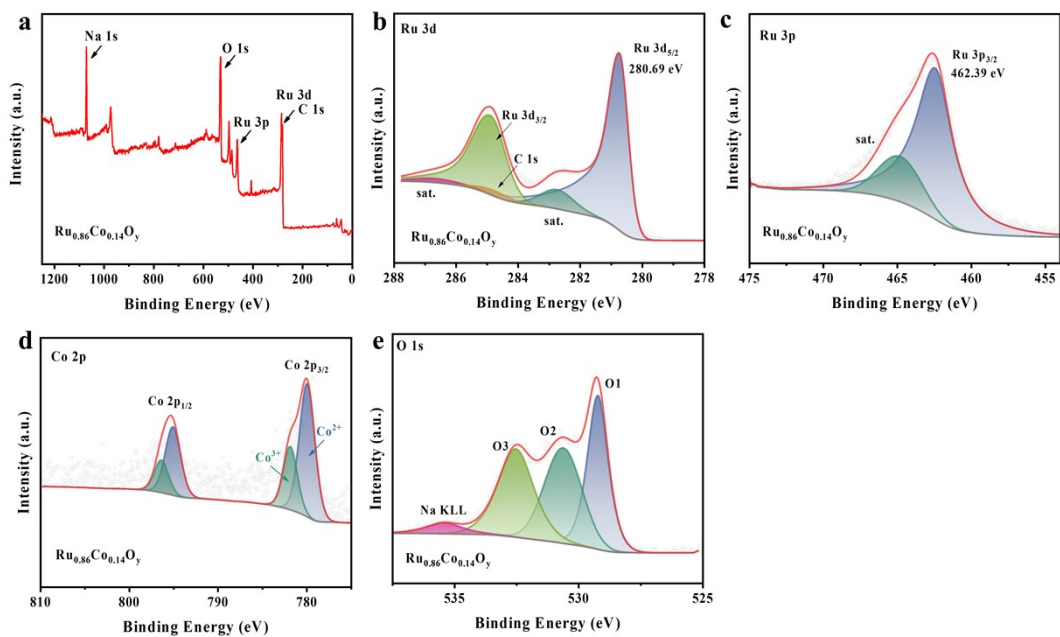

**Fig. S13.** (a) XPS full spectra of  $\text{Ru}_{0.86}\text{Co}_{0.14}\text{O}_y$  and high-resolution XPS spectra of (b) Ru 3d, (c) Ru 3p, (d) Co 2p, (e) O 1s orbitals of  $\text{Ru}_{0.86}\text{Co}_{0.14}\text{O}_y$ .

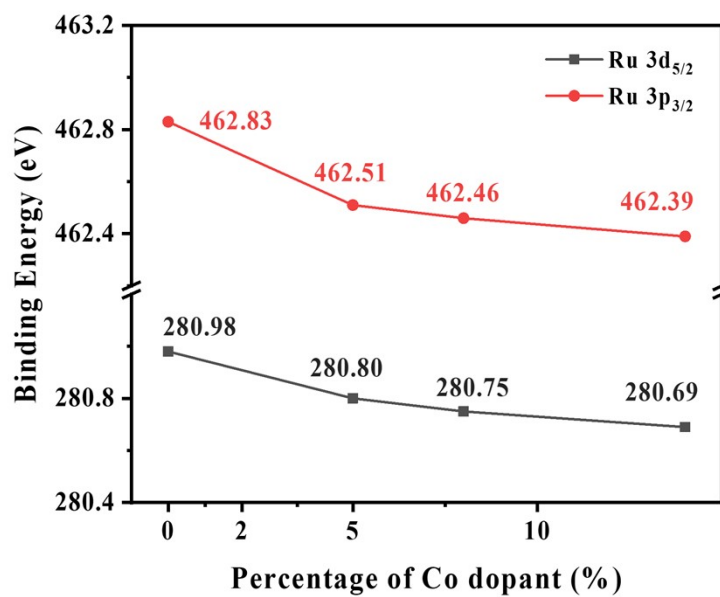

**Fig. S14.** The position of the Ru XPS peaks in relation to the percentage of Co.

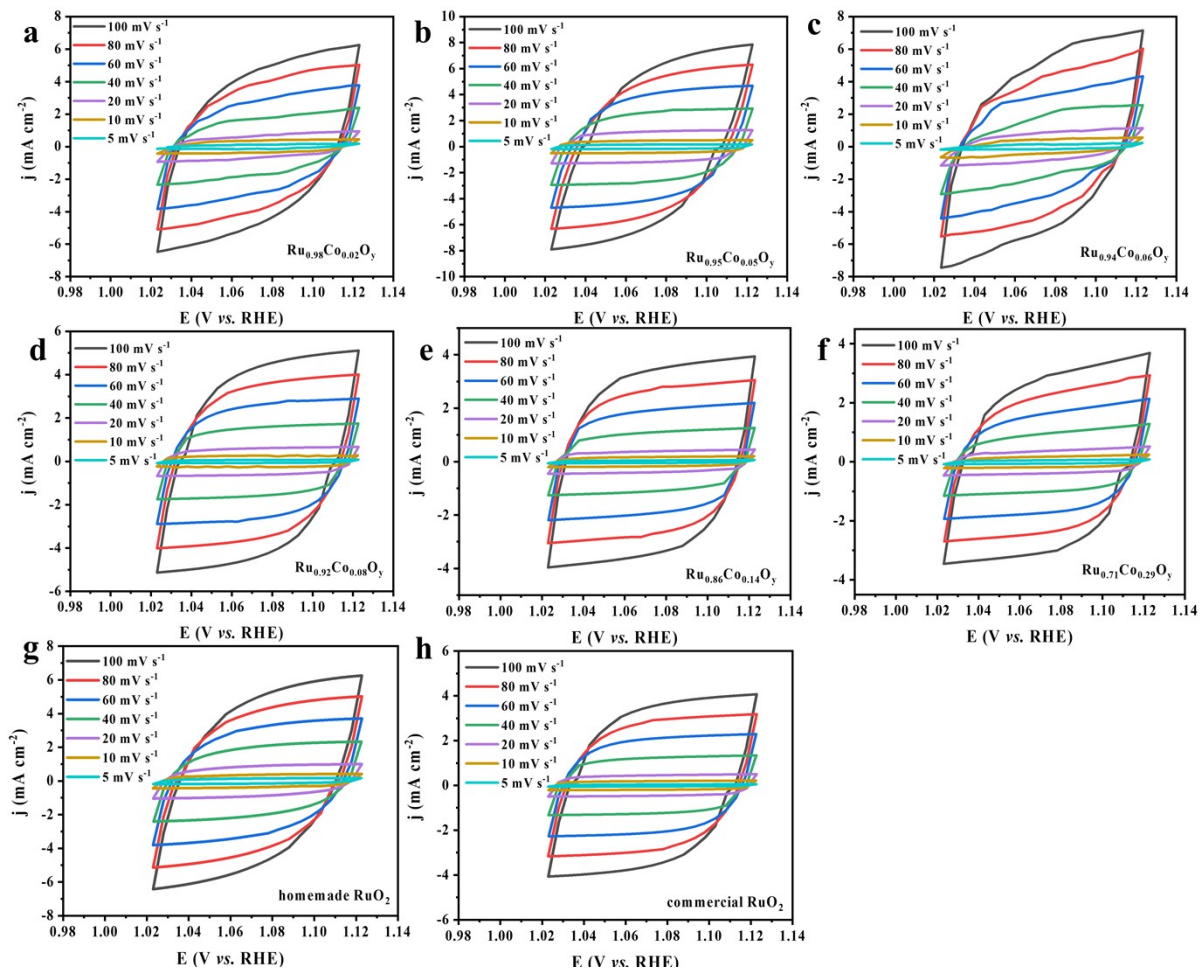

**Fig. S15.** CV curves in a non-Faradic region (1.024~1.124 V vs. RHE) at different scan rates of (a)  $\text{Ru}_{0.98}\text{Co}_{0.02}\text{O}_y$ , (b)  $\text{Ru}_{0.95}\text{Co}_{0.05}\text{O}_y$ , (c)  $\text{Ru}_{0.94}\text{Co}_{0.06}\text{O}_y$ , (d)  $\text{Ru}_{0.92}\text{Co}_{0.08}\text{O}_y$ , (e)  $\text{Ru}_{0.86}\text{Co}_{0.14}\text{O}_y$ , (f)  $\text{Ru}_{0.71}\text{Co}_{0.29}\text{O}_y$ . (g) homemade  $\text{RuO}_2$  and (h) commercial  $\text{RuO}_2$ .

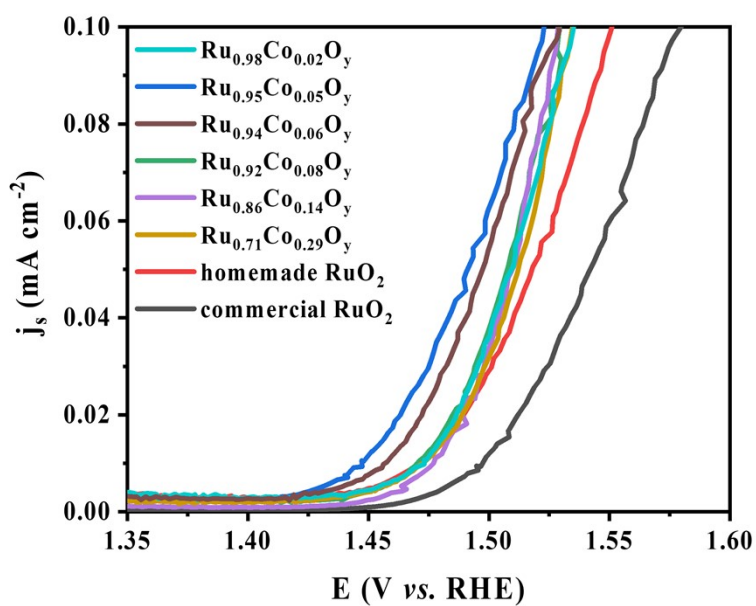

**Fig. S16.** Normalized LSV curves to electrochemically active surface area.

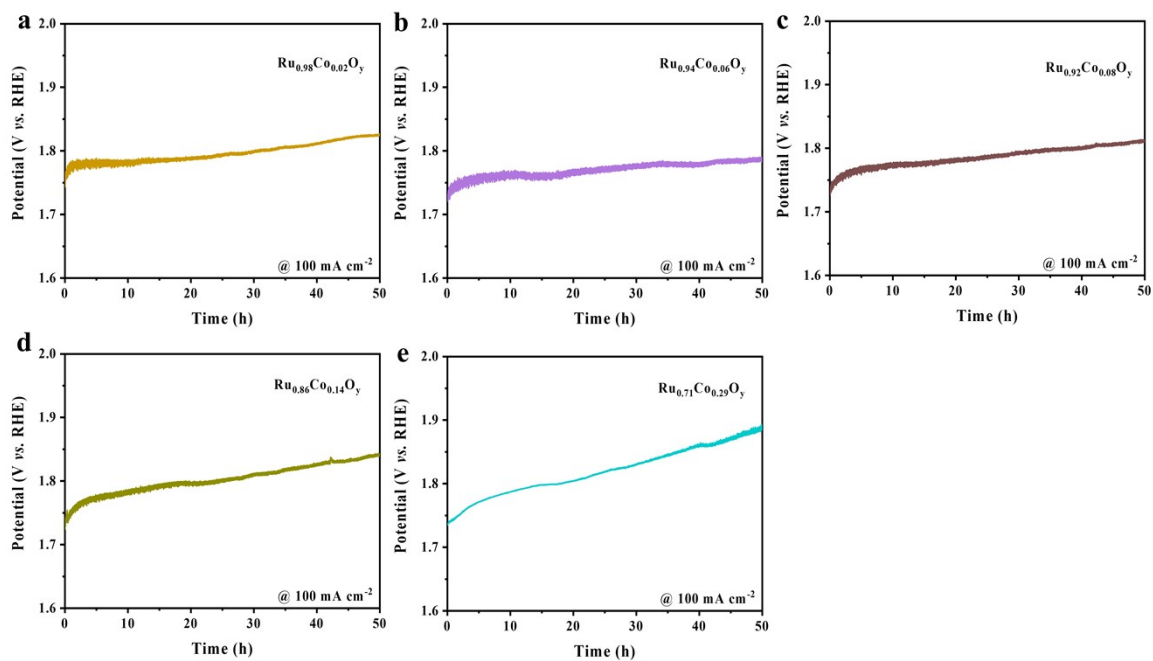

**Fig. S17.** Chronopotentiometric response ( $V$ - $t$ ) curves of (a)  $\text{Ru}_{0.98}\text{Co}_{0.02}\text{O}_y$ , (b)  $\text{Ru}_{0.94}\text{Co}_{0.06}\text{O}_y$ , (c)  $\text{Ru}_{0.92}\text{Co}_{0.08}\text{O}_y$ , (d)  $\text{Ru}_{0.86}\text{Co}_{0.14}\text{O}_y$ , (e)  $\text{Ru}_{0.71}\text{Co}_{0.29}\text{O}_y$  at current densities of  $100 \text{ mA cm}^{-2}$ .

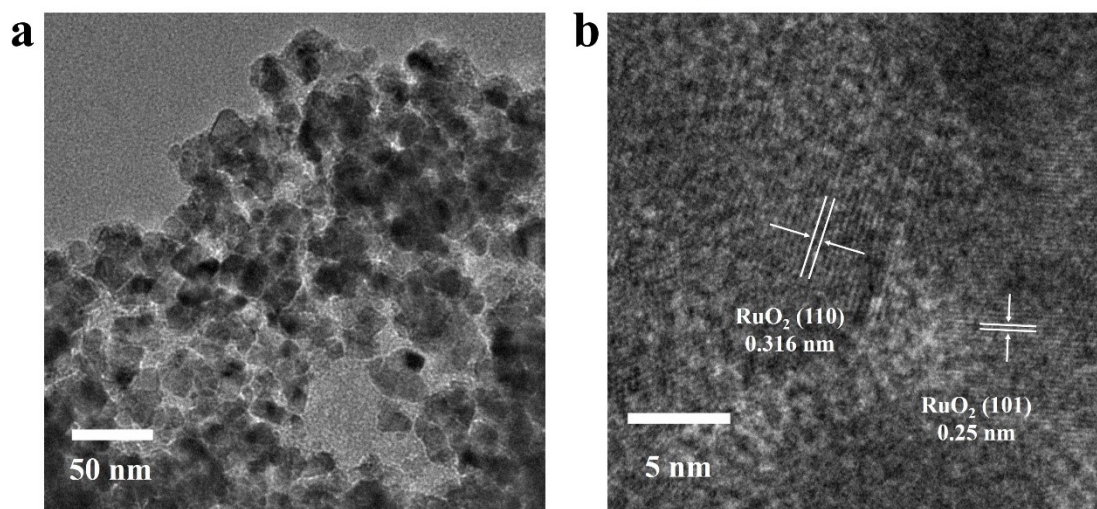

**Fig. S18.** (a) TEM images and (b) HRTEM images of  $\text{Ru}_{0.95}\text{Co}_{0.05}\text{O}_y$  after continuous operation for 50 h at current density of  $100 \text{ mA cm}^{-2}$ .



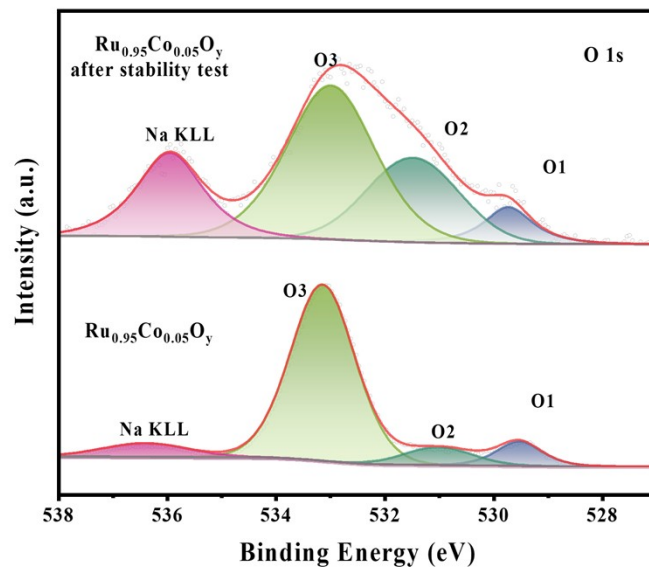

Fig. S19. High-resolution XPS spectra of Co 2p orbitals of  $\text{Ru}_{0.95}\text{Co}_{0.05}\text{O}_y$  after stability test.

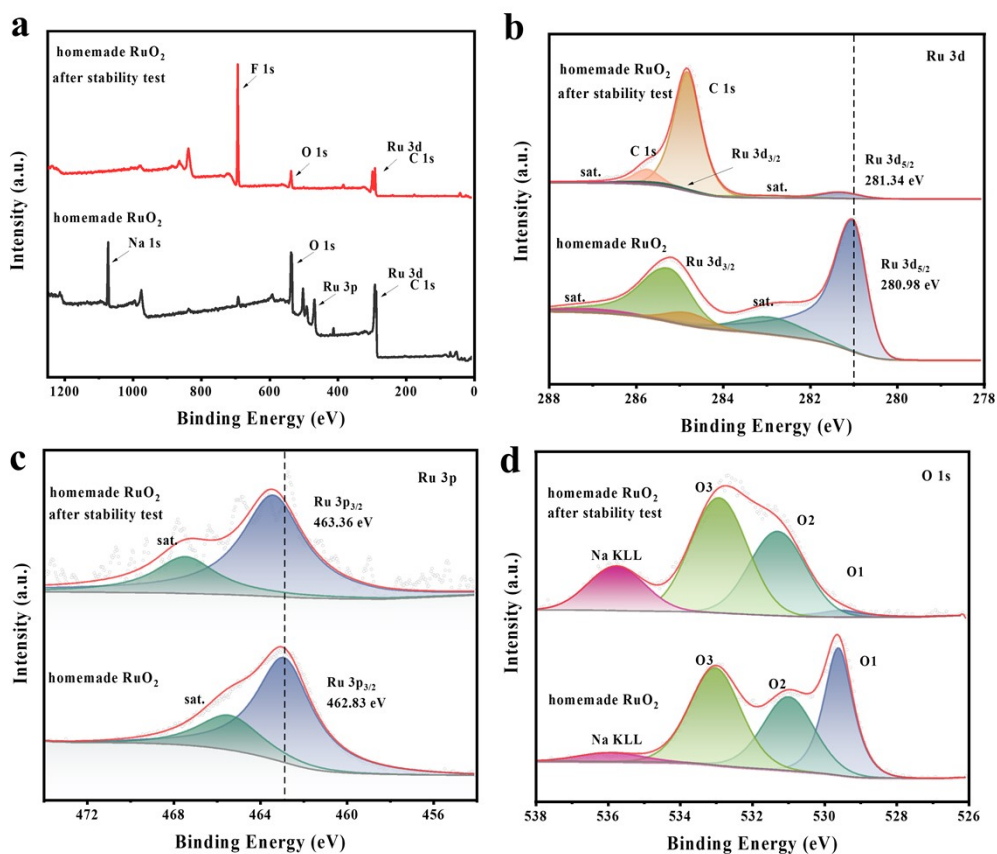

Fig. S20. (a) XPS full spectra and high-resolution XPS spectra of (b) Ru 3d, (c) Ru 3p and (d) O 1s orbitals of homemade  $\text{RuO}_2$  after stability test.

**Table S1.** The content of Ru, Co, O in Ru<sub>1-x</sub>Co<sub>x</sub>O<sub>y</sub> determined by EDS elemental mapping.

|                                                      | At%   |       |       | Percentage of Co in metal atoms(%) |
|------------------------------------------------------|-------|-------|-------|------------------------------------|
|                                                      | O     | Ru    | Co    |                                    |
| Ru <sub>0.98</sub> Co <sub>0.02</sub> O <sub>y</sub> | 65.38 | 33.8  | 0.82  | 2.37                               |
| Ru <sub>0.95</sub> Co <sub>0.05</sub> O <sub>y</sub> | 60.98 | 36.99 | 2.03  | 5.20                               |
| Ru <sub>0.94</sub> Co <sub>0.06</sub> O <sub>y</sub> | 64.5  | 33.29 | 2.21  | 6.23                               |
| Ru <sub>0.92</sub> Co <sub>0.08</sub> O <sub>y</sub> | 64.16 | 33.07 | 2.77  | 7.73                               |
| Ru <sub>0.86</sub> Co <sub>0.14</sub> O <sub>y</sub> | 59.73 | 34.48 | 5.79  | 14.38                              |
| Ru <sub>0.71</sub> Co <sub>0.29</sub> O <sub>y</sub> | 63.24 | 26.08 | 10.68 | 29.05                              |

**Table S2.** Lattice constant of Ru<sub>1-x</sub>Co<sub>x</sub>O<sub>y</sub> from XRD refinement by Rietveld techniques

| Percentage of Co dopant (%) | Lattice Constant (Å) |                   |
|-----------------------------|----------------------|-------------------|
|                             | a                    | c                 |
|                             | 0                    | 4.50923 ± 0.00076 |
| 2                           | 4.51484 ± 0.00299    | 3.10048 ± 0.00199 |
| 5                           | 4.50061 ± 0.00284    | 3.09294 ± 0.00186 |
| 6                           | 4.53003 ± 0.00267    | 3.10346 ± 0.00183 |
| 8                           | 4.49488 ± 0.00156    | 3.07856 ± 0.00099 |
| 14                          | 4.46988 ± 0.00173    | 3.06978 ± 0.00108 |
| 29                          | 4.47050 ± 0.00289    | 3.00289 ± 0.00185 |

**Table S3.** The content of Ru, Co, O in Ru<sub>0.95</sub>Co<sub>0.05</sub>O<sub>y</sub> after the *V-t* test determined by EDS elemental mapping.

|    | Wt%   | At%   | Percentage in metal atoms(%) |
|----|-------|-------|------------------------------|
| O  | 23.18 | 65.12 | --                           |
| Co | 2.3   | 1.75  | 5.02                         |
| Ru | 74.52 | 33.13 | 94.98                        |

**Table S4.** Comparison of OER catalytic performance with previously reported noble-metal-based electrocatalysts in alkaline electrolyte.

| Catalyst                                             | Overpotential <sup>a</sup><br>(mV)                                | Tafel<br>(mV dec <sup>-1</sup> ) | Stability <sup>b</sup><br>(h)    | Reference |
|------------------------------------------------------|-------------------------------------------------------------------|----------------------------------|----------------------------------|-----------|
| Ru <sub>0.95</sub> Co <sub>0.05</sub> O <sub>y</sub> | 217 (@10 mA cm <sup>-2</sup> )<br>290 (@100 mA cm <sup>-2</sup> ) | 50.83                            | 50 (@100 mA cm <sup>-2</sup> )   | This work |
| Homemade RuO <sub>2</sub>                            | 281                                                               | 61.5                             | 50 (@100 mA cm <sup>-2</sup> )   |           |
| Ru-NiCo <sub>2</sub> O <sub>4</sub> NSs              | 230                                                               | 79                               | 42                               | 1         |
| RuCu NSs/C                                           | 234                                                               | -                                | 12                               | 2         |
| a/cRuO <sub>2</sub>                                  | 235                                                               | 43.6                             | 24                               | 3         |
| Ru <sub>1</sub> Co <sub>2</sub> NPs                  | 240                                                               | 54.4                             | 8                                | 4         |
| RuIrO <sub>x</sub>                                   | 250                                                               | 50                               | -                                | 5         |
| RuO <sub>2</sub> /NiO/NF                             | 250                                                               | 50.5                             | 24                               | 6         |
| Li-IrSe <sub>2</sub>                                 | 270                                                               | -                                | 10                               | 7         |
| Ru <sub>0.7</sub> Co <sub>0.3</sub> aerogel          | 272                                                               | 41.6                             | 12.5 (@100 mA cm <sup>-2</sup> ) | 8         |
| Ir@Co NSs                                            | 273                                                               | 99                               | 10                               | 9         |
| IrO <sub>2</sub> @SL-NiFe LDHs                       | 274                                                               | 59                               | 35                               | 10        |
| Ru-MoS <sub>2</sub> -Mo <sub>2</sub> C/TiN           | 280                                                               | 202                              | 50 (@20 mA cm <sup>-2</sup> )    | 11        |
| NiCo <sub>1.7</sub> Ru <sub>0.3</sub> O <sub>4</sub> | 280                                                               | 78                               | 15                               | 12        |
| RuCo@NC                                              | 280                                                               | 91                               | 24                               | 13        |
| a-RuTe <sub>2</sub> PNRs                             | 285                                                               | 62                               | -                                | 14        |
| RuO <sub>2</sub> @NPC                                | 290                                                               | 64                               | 8.33                             | 15        |
| Ir-NR/C                                              | 296                                                               | 60.3                             | -                                | 16        |
| RuO <sub>2</sub> /Co <sub>3</sub> O <sub>4</sub> NBs | 302                                                               | 75.77                            | -                                | 17        |
| CoRu-MoS <sub>2</sub>                                | 308                                                               | 50                               | 16                               | 18        |
| Ru@RuO <sub>2</sub> core-shell nanorods              | 320                                                               | 86                               | 25                               | 19        |
| Ru <sub>2</sub> Ni <sub>2</sub> SNs/C                | 357                                                               | 75                               | -                                | 20        |
| CoNiRu-NT                                            | 255 (@20 mA cm <sup>-2</sup> )<br>335 (@100 mA cm <sup>-2</sup> ) | 67                               | 48 (@100 mA cm <sup>-2</sup> )   | 21        |

a: Overpotential at the current density of 10 mA cm<sup>-2</sup> unless specifically marked.

b: Stability tests at the current density of 10 mA cm<sup>-2</sup> unless specifically marked.

**Table S5.** Comparison of noble metal losses during OER durability test.

| Catalyst                                          | Stability operation time <sup>a</sup><br>(h) | Noble metal loss<br>(%) | Reference |
|---------------------------------------------------|----------------------------------------------|-------------------------|-----------|
| RuCoO <sub>y</sub> -2                             | 50 (@100 mA cm <sup>-2</sup> )               | 0.058                   | This work |
| Homemade RuO <sub>2</sub>                         | 50 (@100 mA cm <sup>-2</sup> )               | 0.12                    |           |
| a/cRuO <sub>2</sub>                               | 24                                           | 2.04                    | 3         |
| Li-IrSe <sub>2</sub>                              | 10 (@20 mA cm <sup>-2</sup> )                | 0.38                    | 7         |
| SrTi(Ir)O <sub>3</sub>                            | 10                                           | 0.44                    | 22        |
| RuNi <sub>x</sub> @G-T                            | 24                                           | 1.5                     | 23        |
| CaCu <sub>3</sub> Ru <sub>4</sub> O <sub>12</sub> | 24                                           | 2.7                     | 24        |
| Ru-N-C                                            | 30                                           | 5                       | 25        |

a: Stability tests at the current density of 10 mA cm<sup>-2</sup> unless specifically marked.

## Reference

1. R. Yang, X. Shi, Y. Wang, J. Jin, H. Liu, J. Yin, Y.-Q. Zhao and P. Xi, *Chinese Chemical Letters*, 2022, **33**, 4930-4935.
2. Q. Yao, B. Huang, N. Zhang, M. Sun, Q. Shao and X. Huang, *Angewandte Chemie International Edition*, 2019, **58**, 13983-13988.
3. L. Zhang, H. Jang, H. Liu, M. G. Kim, D. Yang, S. Liu, X. Liu and J. Cho, *Angewandte Chemie International Edition*, 2021, **60**, 18821-18829.
4. Y. Bao, J. Dai, J. Zhao, Y. Wu, C. Li, L. Ji, X. Zhang and F. Yang, *ACS Applied Energy Materials*, 2020, **3**, 1869-1874.
5. Z. Zhuang, Y. Wang, C.-Q. Xu, S. Liu, C. Chen, Q. Peng, Z. Zhuang, H. Xiao, Y. Pan, S. Lu, R. Yu, W.-C. Cheong, X. Cao, K. Wu, K. Sun, Y. Wang, D. Wang, J. Li and Y. Li, *Nature Communications*, 2019, **10**.
6. J. Liu, Y. Zheng, Y. Jiao, Z. Wang, Z. Lu, A. Vasileff and S. Z. Qiao, *Small*, 2018, **14**.
7. T. Zheng, C. Shang, Z. He, X. Wang, C. Cao, H. Li, R. Si, B. Pan, S. Zhou and J. Zeng, *Angewandte Chemie International Edition*, 2019, **58**, 14764-14769.
8. Z. Lin, S. Liu, Y. Liu, Z. Liu, S. Zhang, X. Zhang, Y. Tian and Z. Tang, *Journal of Power Sources*, 2021, **514**.
9. D. D. Babu, Y. Huang, G. Anandhababu, X. Wang, R. Si, M. Wu, Q. Li, Y. Wang and J. Yao, *Journal of Materials Chemistry A*, 2019, **7**, 8376-8383.
10. D. Li, T. Li, G. Hao, W. Guo, S. Chen, G. Liu, J. Li and Q. Zhao, *Chemical Engineering Journal*, 2020, **399**.
11. V. H. Hoa, D. T. Tran, S. Prabhakaran, D. H. Kim, N. Hameed, H. Wang, N. H. Kim and J. H. Lee, *Nano Energy*, 2021, **88**.
12. C. Peng, H. Liu, J. Chen, Y. Zhang, L. Zhu, Q. Wu, W. Zou, J. Wang, Z. Fu and Y. Lu, *Applied Surface Science*, 2021, **544**.

13. B. Sarkar, D. Das and K. K. Nanda, *Green Chemistry*, 2020, **22**, 7884-7895.
14. J. Wang, L. Han, B. Huang, Q. Shao, H. L. Xin and X. Huang, *Nature Communications*, 2019, **10**.
15. N. Wang, S. Ning, X. Yu, D. Chen, Z. Li, J. Xu, H. Meng, D. Zhao, L. Li, Q. Liu, B. Lu and S. Chen, *Applied Catalysis B: Environmental*, 2022, **302**.
16. F. Luo, L. Guo, Y. Xie, J. Xu, K. Qu and Z. Yang, *Applied Catalysis B: Environmental*, 2020, **279**.
17. B.-Y. Guo, X.-Y. Zhang, X. Ma, T.-S. Chen, Y. Chen, M.-L. Wen, J.-F. Qin, J. Nan, Y.-M. Chai and B. Dong, *International Journal of Hydrogen Energy*, 2020, **45**, 9575-9582.
18. I. S. Kwon, T. T. Debelo, I. H. Kwak, Y. C. Park, J. Seo, J. Y. Shim, S. J. Yoo, J. G. Kim, J. Park and H. S. Kang, *Small*, 2020, **16**.
19. R. Jiang, D. T. Tran, J. Li and D. Chu, *Energy & Environmental Materials*, 2019, **2**, 201-208.
20. J. Ding, Q. Shao, Y. Feng and X. Huang, *Nano Energy*, 2018, **47**, 1-7.
21. Y. Wang, S. Wang, Z. L. Ma, L. T. Yan, X. B. Zhao, Y. Y. Xue, J. M. Huo, X. Yuan, S. N. Li and Q. G. Zhai, *Advanced Materials*, 2022, **34**.
22. H. Chen, L. Shi, X. Liang, L. Wang, T. Asefa and X. Zou, *Angewandte Chemie International Edition*, 2020, **59**, 19654-19658.
23. X. Cui, P. Ren, C. Ma, J. Zhao, R. Chen, S. Chen, N. P. Rajan, H. Li, L. Yu, Z. Tian and D. Deng, *Advanced Materials*, 2020, **32**.
24. X. Miao, L. Zhang, L. Wu, Z. Hu, L. Shi and S. Zhou, *Nature Communications*, 2019, **10**.
25. L. Cao, Q. Luo, J. Chen, L. Wang, Y. Lin, H. Wang, X. Liu, X. Shen, W. Zhang, W. Liu, Z. Qi, Z. Jiang, J. Yang and T. Yao, *Nature Communications*, 2019, **10**.
